# Supplementary material for: Immunogenicity Evaluating of the Multivalent COVID-19 Inactivated Vaccine against the SARS-CoV-2 Variants
Source: MDPI journal article supplement (doi:10.3390/vaccines10060956), 2022-06-16
Supplement: s1 [file s1]

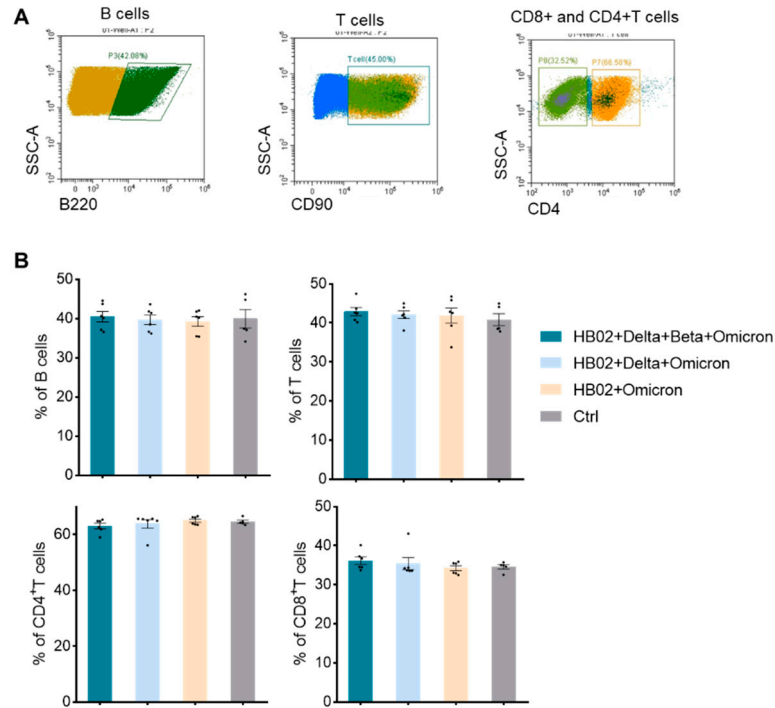

**Figure S1.** The effect of vaccines on various immune cells. (A) The representative flow cytometry figures of B cells (gated in live CD45+), T cells (gated in live CD45+CD90+), CD8+ T cells (gated in live CD45+CD90+CD4-) and CD4+ T cells (gated in live CD45+CD90+CD4) in spleens are shown. (B) Percentages of B cells, T cells, CD4+ T and CD8+ T cells in the spleen were analyzed using flow cytometry.

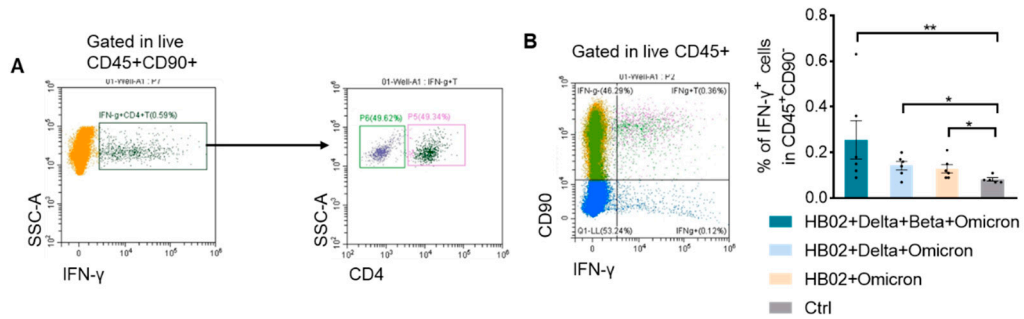

**Figure S2.** IFN- $\gamma$ -expressing cell analysis by FACS. (A) The representative flow cytometry figures of IFN- $\gamma$ + T cells (gated in live CD45+) in spleens are shown. (B) Percentages of CD90- IFN- $\gamma$ + cells in the spleen were analyzed using flow cytometry. Error bars represent SEM. \* $p < 0.05$ ; \*\* $p < 0.01$ .
